# Supplementary material for: Si-based nanocomposites derived from layered CaSi2: influence of synthesis conditions on the composition and anode performance in Li ion batteries
Source: Royal Society of Chemistry journal article supplement (doi:10.1039/c4ta01318b), 2014-01-01
Supplement: c4ta01318b1.pdf [file c4ta01318b1.pdf]

**Supplementary Information**  
**for**  
**Si-based nanocomposites derived from layered CaSi<sub>2</sub>:**  
**Influence of synthesis conditions on composition and anode**  
**performance in Li ion batteries.**

Song-Yul Oh,\* Haruo Imagawa and Hiroshi Itahara\*\*

Toyota Central Research & Development Labs., Inc.,  
41-1 Yokomichi Nagakute, Aichi 480-1192, Japan.

E-mail: \*e1634@mosk.tytlabs.co.jp, \*\*h-itahara@mosk.tytlabs.co.jp

Sample preparation:

Mixture of CaSi<sub>2</sub> +  $\alpha$  NiCl<sub>2</sub> ( $\alpha$ : molar ratio) → heated at 600 degree C → Washed with anhydrous dimethylformamide.

The nitrogen adsorption isotherms:

The isotherms were measured at 77 K for the prepared powders containing Ca<sub>x</sub>Si<sub>2</sub> particles (Nova 3000e instrument, Quantachrome Instruments). The specific surface area was calculated by the BET method using adsorption data ranging from P/P<sub>0</sub> = 0.10 to 0.30 where P and P<sub>0</sub> represents the pressure obtaining adsorption data and saturated vapour pressure of N<sub>2</sub>, respectively.

Table S1. Specific surface area for samples containing Ca<sub>x</sub>Si<sub>2</sub> particles.

| sample | Temp./°C | $\alpha$ | surface area<br>(m <sup>2</sup> /g) |
|--------|----------|----------|-------------------------------------|
| A6     | 600      | 0.7      | 8.36                                |
| A5     |          | 1.0      | 22.1                                |
| A4     |          | 1.1      | 29.8                                |

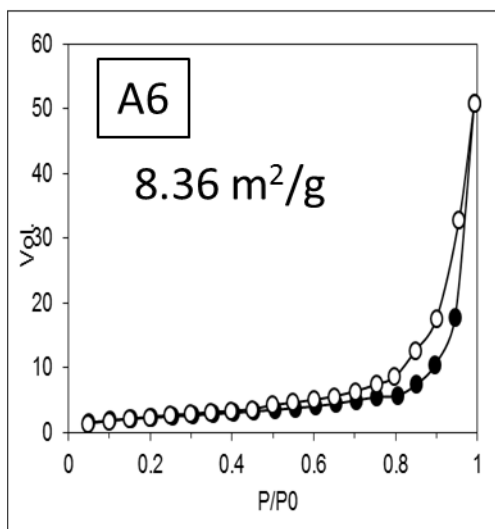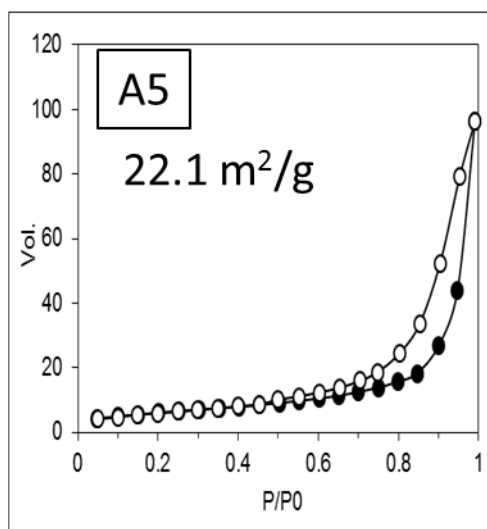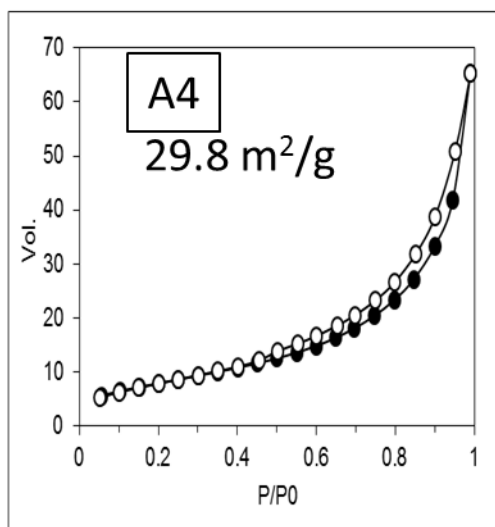

Figure S1. Nitrogen adsorption isotherms
